# Supplementary material for: Mixed ligand cobalt(ii) picolinate complexes: synthesis, characterization, DNA binding and photocleavage
Source: Royal Society of Chemistry journal article supplement (doi:10.1039/c0dt01078b), 2010-12-03
Supplement: c0dt01078b.pdf [file c0dt01078b.pdf]

## Mixed ligand cobalt(II) picolinate complexes: synthesis, characterization, DNA binding and photocleavage

Vitthal A. Kawade,<sup>a</sup> Anupa A. Kumbhar,<sup>a</sup> Avinash S. Kumbhar,<sup>\*a</sup> Christian Näther,<sup>b</sup> Andrea Erxleben,<sup>c</sup> Uddhavesh B. Sonawane<sup>d</sup> and Rajendra R. Joshi<sup>d</sup>

<sup>a</sup>Department of Chemistry, University of Pune, Pune 411007, India,

<sup>b</sup>Institut für Anorganische Chemie, Universität zu Kiel, Max-Eyth-Strasse 2, 24098 Kiel, Germany,

<sup>c</sup>School of Chemistry, National University of Ireland (NUI), Galway, Ireland,

<sup>d</sup>Bioinformatics Team, Centre for Development of Advanced Computing (C-DAC), Pune 411007, India.

\*E-mail: askum@chem.unipune.ac.in Fax: (+91)- 020- 25691728; Tel: (+91)- 020- 25601395(534).

### Supporting Information:

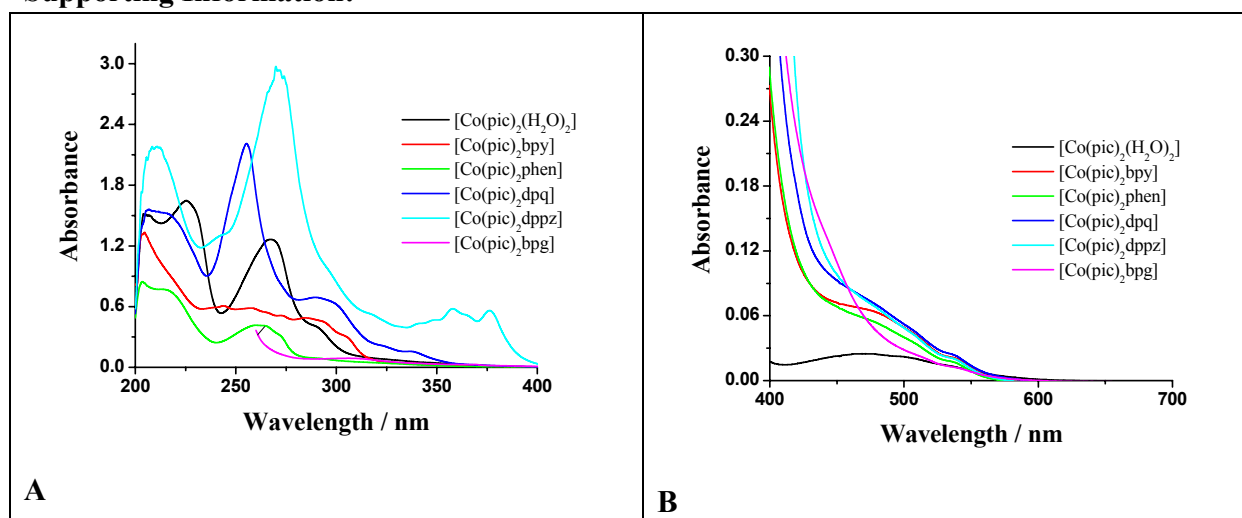

**Fig. S1** Absorption spectra of complexes **1–5** in methanol and **6** in DMSO medium **A)** [Complex] =  $1.7 \times 10^{-4}$  M **B)**  $1 \times 10^{-3}$  M.

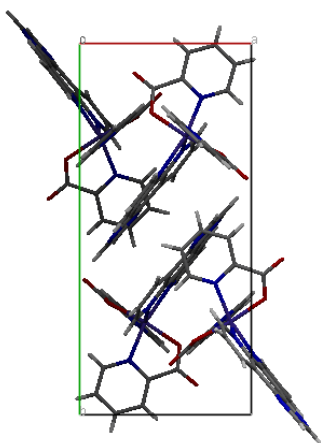

**Fi g. S2** Packing diagram of the complex **4**.

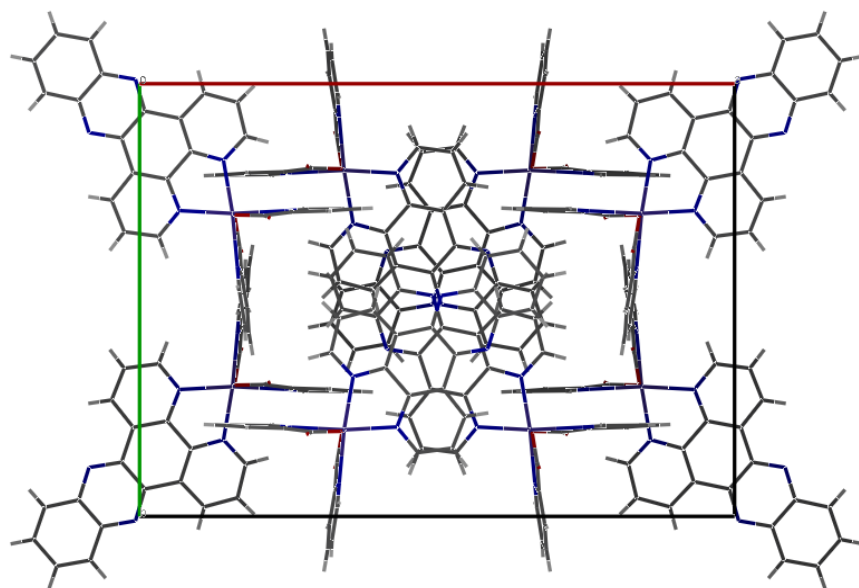

Fig. S3 Packing diagram of the complex 5.

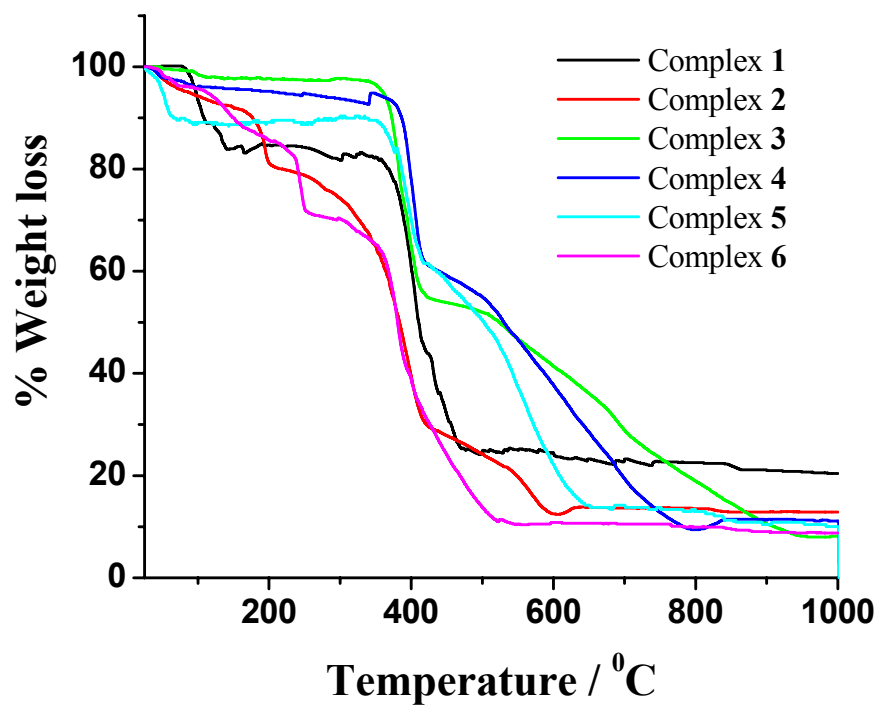

Fig. S4 Thermal analysis curves of the complexes 1–6.

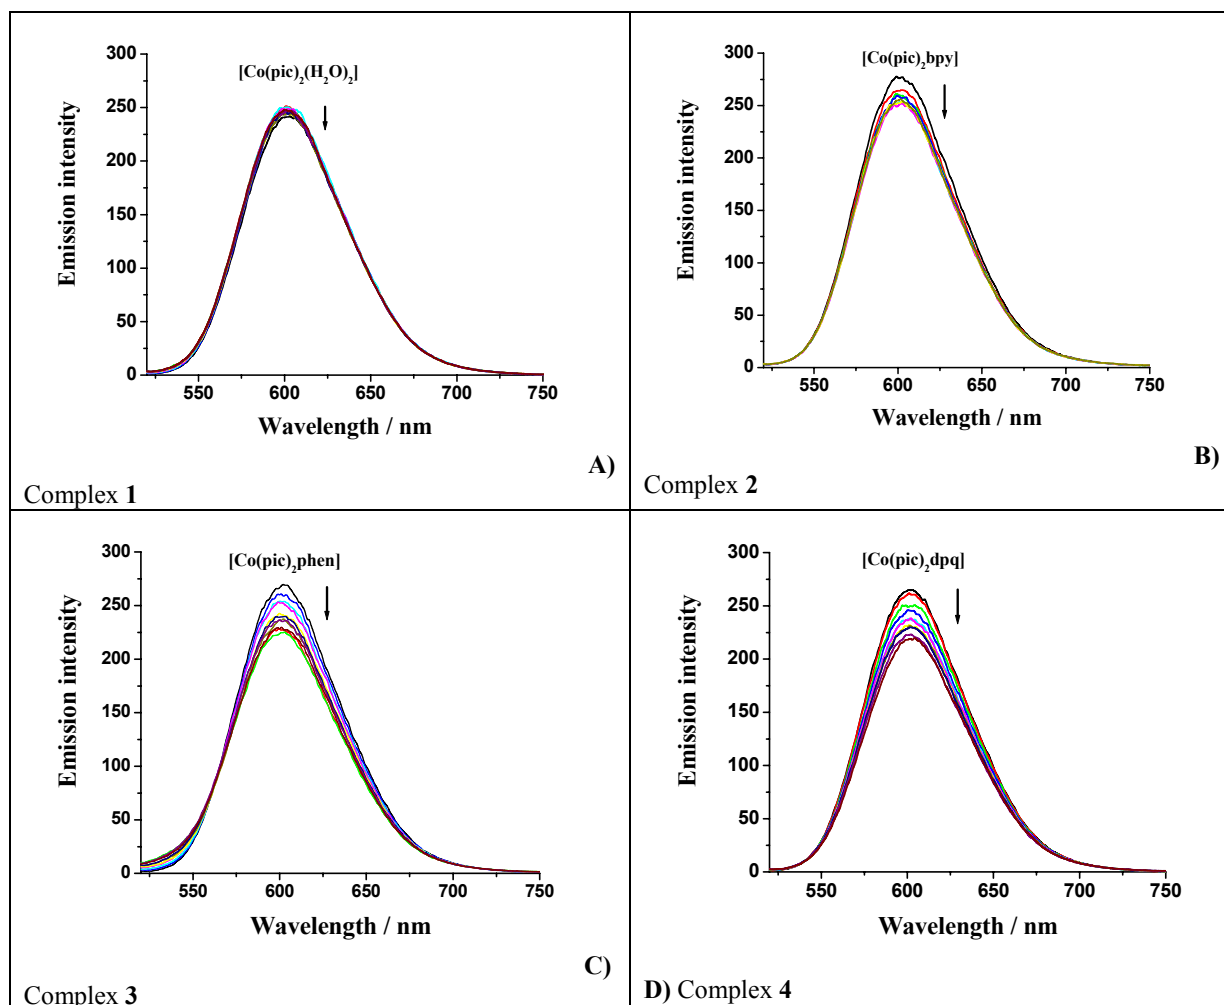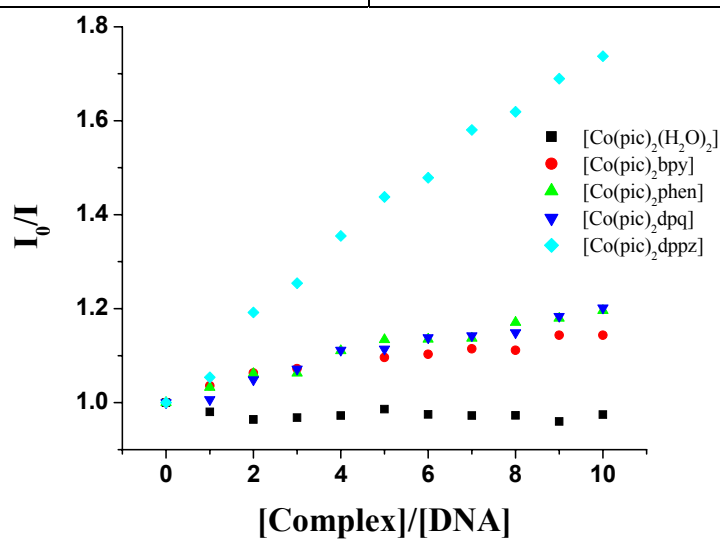

**Fig. S5** Fluorescence quenching curves of ethidium bromide bound to DNA by complexes 1–4.  $[\text{DNA}] = 20 \mu\text{M}$ ,  $[\text{EB}] = 20 \mu\text{M}$  and  $[\text{Complex}] = 0$  to  $200 \mu\text{M}$ . Effect of increase in concentration of complex 1 (■), 2 (●), 3 (▲), 4 (▼), 5 (◆) on the intensity of EB and the plot of  $I_0/I$  vs.  $[\text{Complex}]/[\text{DNA}]$ .  $\lambda_{\text{ex}} = 510 \text{ nm}$ .

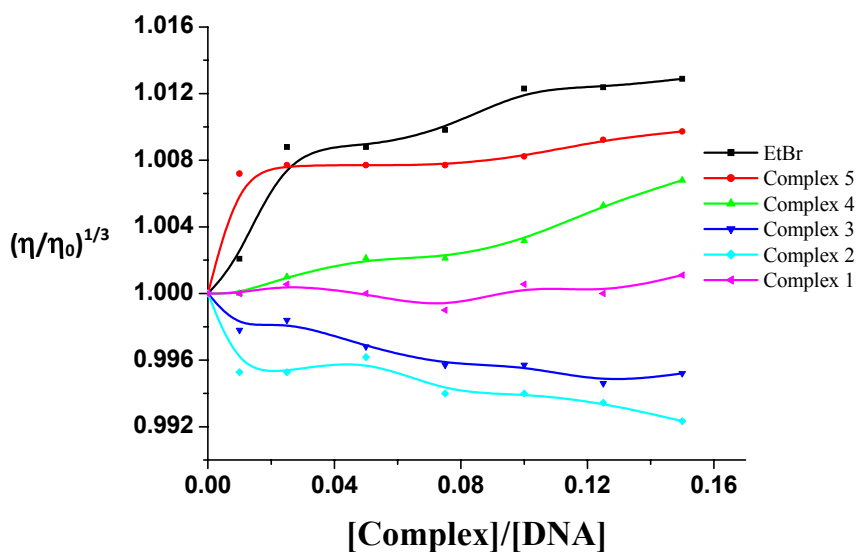

**Fig. S6** Change in the viscosity of CT-DNA (200  $\mu\text{M}$ ) in the presence of increasing amounts of complexes 1–5.

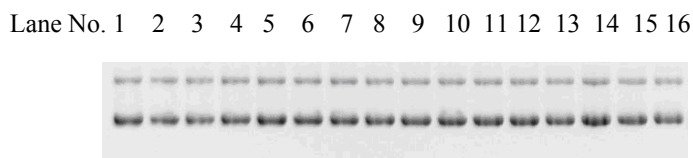

**Fig. S7** Gel electrophoresis diagram showing the cleavage of plasmid *pBR322* DNA (300 ng) by Co(II) complexes 1–5 in TBE buffer (pH 8.2). Incubation time 30 min. at 37 °C. [DNA] = 200ng, Lane 1, DNA control; Lane 2, DNA + 1 (20  $\mu\text{M}$ ); Lane 3, DNA + 1 (50  $\mu\text{M}$ ); Lane 4, DNA + 1 (100  $\mu\text{M}$ ); Lane 5, DNA + 2 (20  $\mu\text{M}$ ); Lane 6, DNA + 2 (50  $\mu\text{M}$ ); Lane 7, DNA + 2 (100  $\mu\text{M}$ ); Lane 8, DNA+ 3 (20  $\mu\text{M}$ ); Lane 9, DNA + 3 (50  $\mu\text{M}$ ); Lane 10, DNA + 3 (100  $\mu\text{M}$ ); Lane 11, DNA + 4 (20  $\mu\text{M}$ ); Lane 12, DNA + 4 (50  $\mu\text{M}$ ); Lane 13, DNA + 4 (100  $\mu\text{M}$ ); Lane 14, DNA + 5 (20  $\mu\text{M}$ ); Lane 15, DNA + 5 (50  $\mu\text{M}$ ); Lane 16, DNA+ 5 (100  $\mu\text{M}$ ).

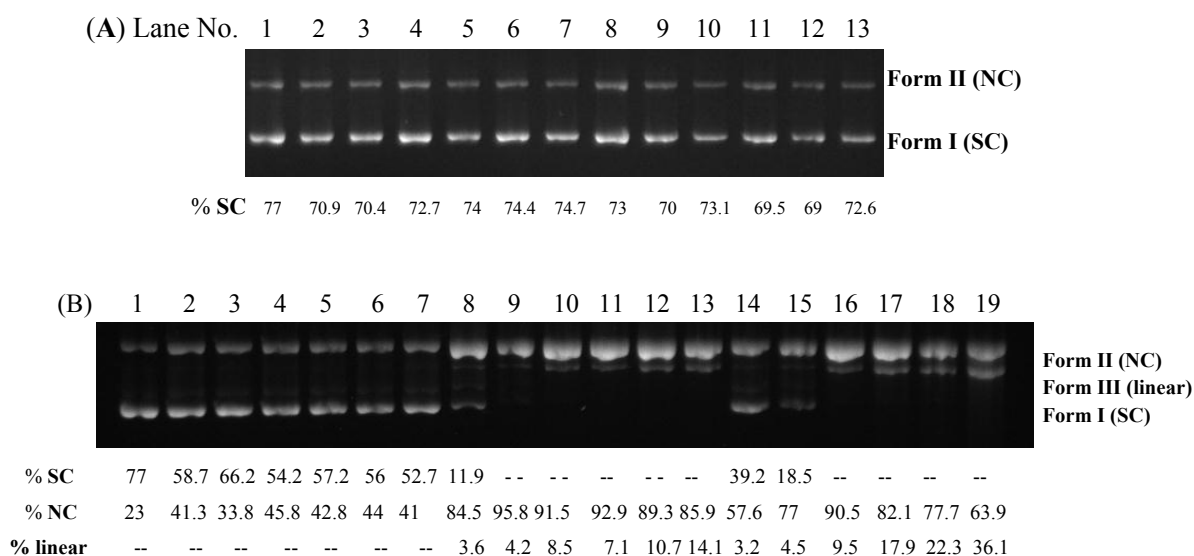

**Fig. S8** Gel electrophoresis diagram showing the extent of cleavage of plasmid *pBR322* DNA (300 ng) by complexes **1–5** in TBE buffer (pH 8.2) in presence of H<sub>2</sub>O<sub>2</sub>. Incubation time 30 min. at 37 °C. [complexes] = 10–100 μM. (A) Lane 1, DNA control; Lane 2, DNA + **1** (10 μM); Lane 3, DNA + **1** (20 μM); Lane 4, DNA + **1** (40 μM); Lane 5, DNA + **1** (60 μM); Lane 6, DNA + **1** (80 μM); Lane 7, DNA + **1** (100 μM); Lane 8, DNA+ **2** (10 μM); Lane 9, DNA + **2** (20 μM); Lane 10, DNA + **2** (40 μM); Lane 11, DNA + **2** (60 μM); Lane 12, DNA + **2** (80 μM); Lane 13, DNA + **2** (100 μM); (B) Lane 1, DNA control; Lane 2, DNA + **3** (10 μM); Lane 3, DNA + **3** (20 μM); Lane 4, DNA + **3** (40 μM); Lane 5, DNA + **3** (60 μM); Lane 6, DNA + **3** (80 μM); Lane 7, DNA + **3** (100 μM); Lane 8, DNA+ **4** (10 μM); Lane 9, DNA + **4** (20 μM); Lane 10, DNA + **4** (40 μM); Lane 11, DNA + **4** (60 μM); Lane 12, DNA + **4** (80 μM); Lane 13, DNA + **4** (100 μM); Lane 14, DNA+ **5** (10 μM); Lane 15, DNA + **5** (20 μM); Lane 16, DNA + **5** (40 μM); Lane 17, DNA + **5** (60 μM); Lane 18, DNA + **5** (80 μM); Lane 19, DNA + **5** (100 μM).

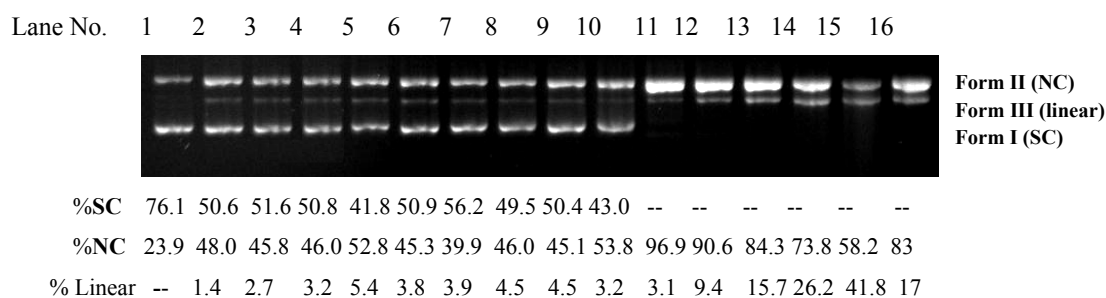

**Fig. S9** 1 % agarose gel showing the cleavage of *pBR322* plasmid DNA by complexes **1–5**. [DNA] = 200ng, on irradiation for 20 min. at 365 nm after 10 min. incubation at 37 °C, TBE buffer, pH 8.2, (A) Lane 1, DNA control; Lane 2, DNA + **1** (20 μM); Lane 3, DNA + **1** (50 μM); Lane 4, DNA + **1** (100 μM); Lane 5, DNA + **2** (20 μM); Lane 6, DNA + **2** (50 μM); Lane 7, DNA + **2** (100 μM); Lane 8, DNA+ **3** (20 μM); Lane 9, DNA + **3** (50 μM); Lane 10, DNA + **3** (100 μM); Lane 11, DNA + **4** (20 μM); Lane 12, DNA + **4** (50 μM); Lane 13, DNA + **4** (100 μM); Lane 14, DNA + **5** (20 μM); Lane 15, DNA + **5** (50 μM); Lane 16, DNA+ **5** (100 μM).

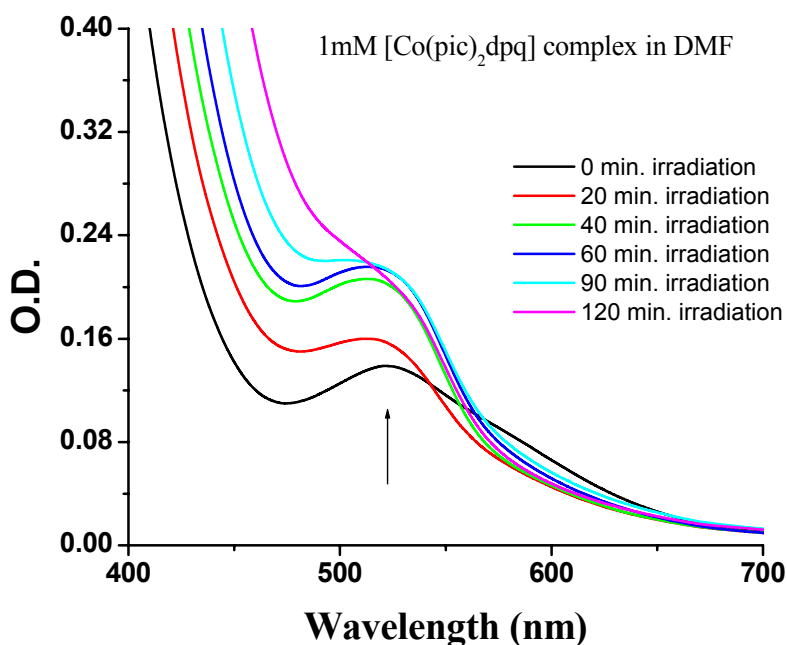

**Fig. S10** Absorption spectra of 1mM complex **4** in DMF before and after irradiation.

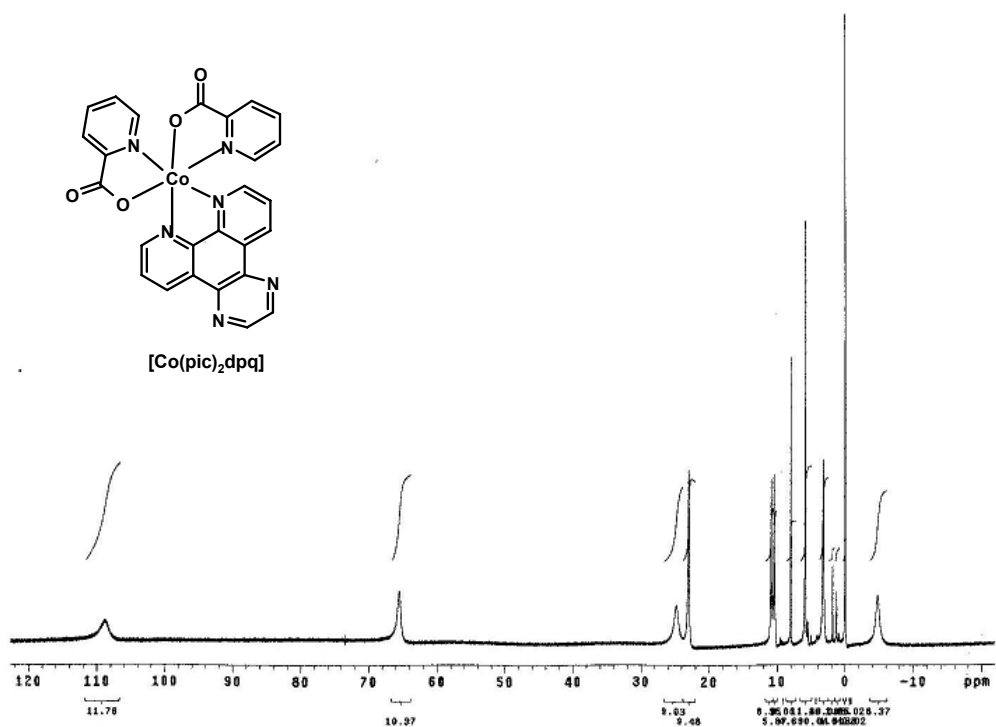

Fig. S11 <sup>1</sup>H NMR of complex 4 in CDCl<sub>3</sub> solvent.

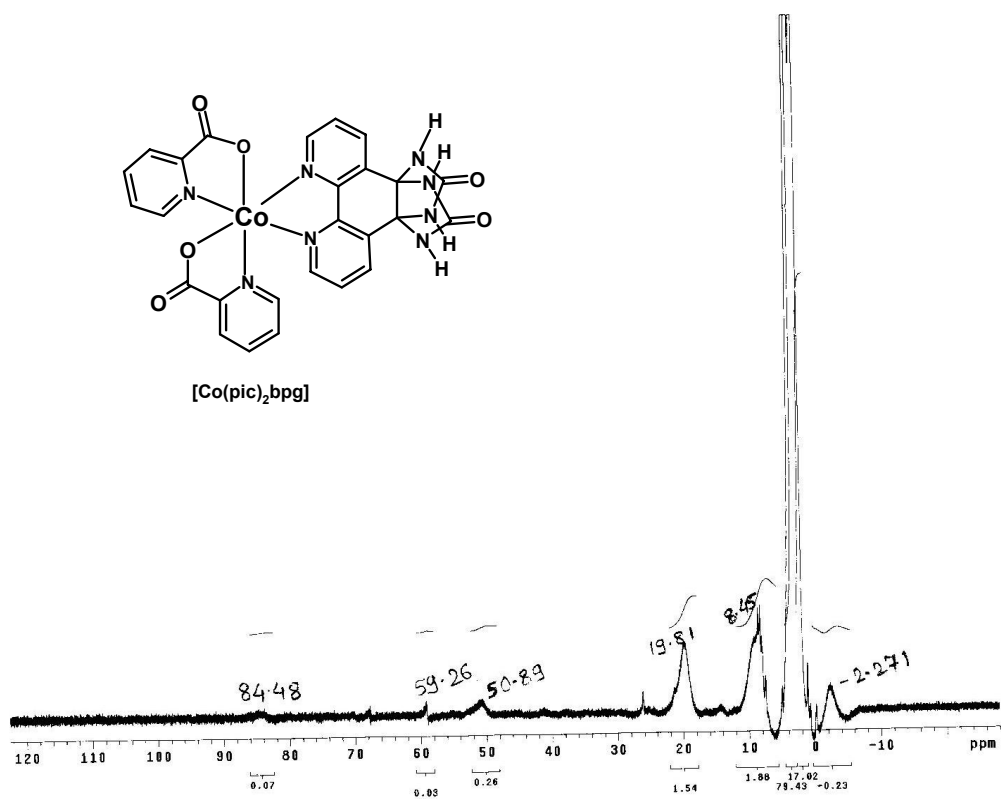

Fig. S12 <sup>1</sup>H-NMR spectra of complex 6 in DMSO-*d*<sub>6</sub>.

**Table S1.** Selected calculated and observed bond lengths [ $\text{\AA}$ ] and angles [ $^\circ$ ] in complexes **2–6**

| Complex      | <b>2</b>                       |                          | <b>3</b>                       |                          | <b>4</b>          |                          | <b>5</b>          |                          | <b>6</b>          |                          |
|--------------|--------------------------------|--------------------------|--------------------------------|--------------------------|-------------------|--------------------------|-------------------|--------------------------|-------------------|--------------------------|
|              | Crystal Structure <sup>#</sup> | 6-31G (d,p) <sup>S</sup> | Crystal Structure <sup>#</sup> | 6-31G (d,p) <sup>S</sup> | Crystal Structure | 6-31G (d,p) <sup>S</sup> | Crystal Structure | 6-31G (d,p) <sup>S</sup> | Crystal Structure | 6-31G (d,p) <sup>S</sup> |
| Co-N (pic)   | 2.163(4)                       | 2.203                    | 2.140(3)                       | 2.176                    | 2.122(3)          | 2.175                    | 2.142(4)          | 2.176                    | 2.120(6)          | 2.200                    |
| Co-O (pic)   | 2.047(3)                       | 2.018                    | 2.056(3)                       | 2.031                    | 2.058(2)          | 2.030                    | 2.045(3)          | 2.030                    | 2.070(5)          | 2.012                    |
| Co-N (pic)   | 2.153(4)                       | 2.204                    | 2.135(3)                       | 2.176                    | 2.130(3)          | 2.175                    | 2.136(4)          | 2.176                    | 2.120(6)          | 2.200                    |
| Co-O (pic)   | 2.049(3)                       | 2.018                    | 2.053(3)                       | 2.031                    | 2.061(2)          | 2.030                    | 2.053(3)          | 2.030                    | 2.070(5)          | 2.012                    |
| Co-N (NN)    | 2.137(3)                       | 2.248                    | 2.131(3)                       | 2.232                    | 2.153(3)          | 2.231                    | 2.158(4)          | 2.229                    | 2.159(6)          | 2.265                    |
| Co-N (NN)    | 2.105(16)                      | 2.249                    | 2.135(3)                       | 2.232                    | 2.162(3)          | 2.231                    | 2.139(4)          | 2.228                    | 2.159(6)          | 2.265                    |
| N-Co-N (NN)  | 76.21(11)                      | 71.89                    | 78.59(11)                      | 75.48                    | 77.46(11)         | 75.19                    | 77.17(14)         | 75.17                    | 75.41(2)          | 71.66                    |
| N-Co-O (pic) | 79.02(14)                      | 78.68                    | 78.64(12)                      | 78.37                    | 78.52(10)         | 78.40                    | 78.76(14)         | 78.35                    | 78.50(2)          | 78.33                    |
| N-Co-O (pic) | 78.87(13)                      | 78.68                    | 77.89(11)                      | 78.36                    | 78.42(10)         | 78.40                    | 79.14(14)         | 78.35                    | 78.50(2)          | 78.33                    |

pic= picolinate, NN = polypyridyl ligand. <sup>#</sup> Values from Reference No. 20, <sup>S</sup> Basis sets used in geometry calculations.
